# Supplementary material for: Ribosomal RNA gene repeats associate with the nuclear pore complex for maintenance after DNA damage
Source: PubMed Central journal article supplement (PMC6490929; doi:10.1371/journal.pgen.1008103), 2019-04-18

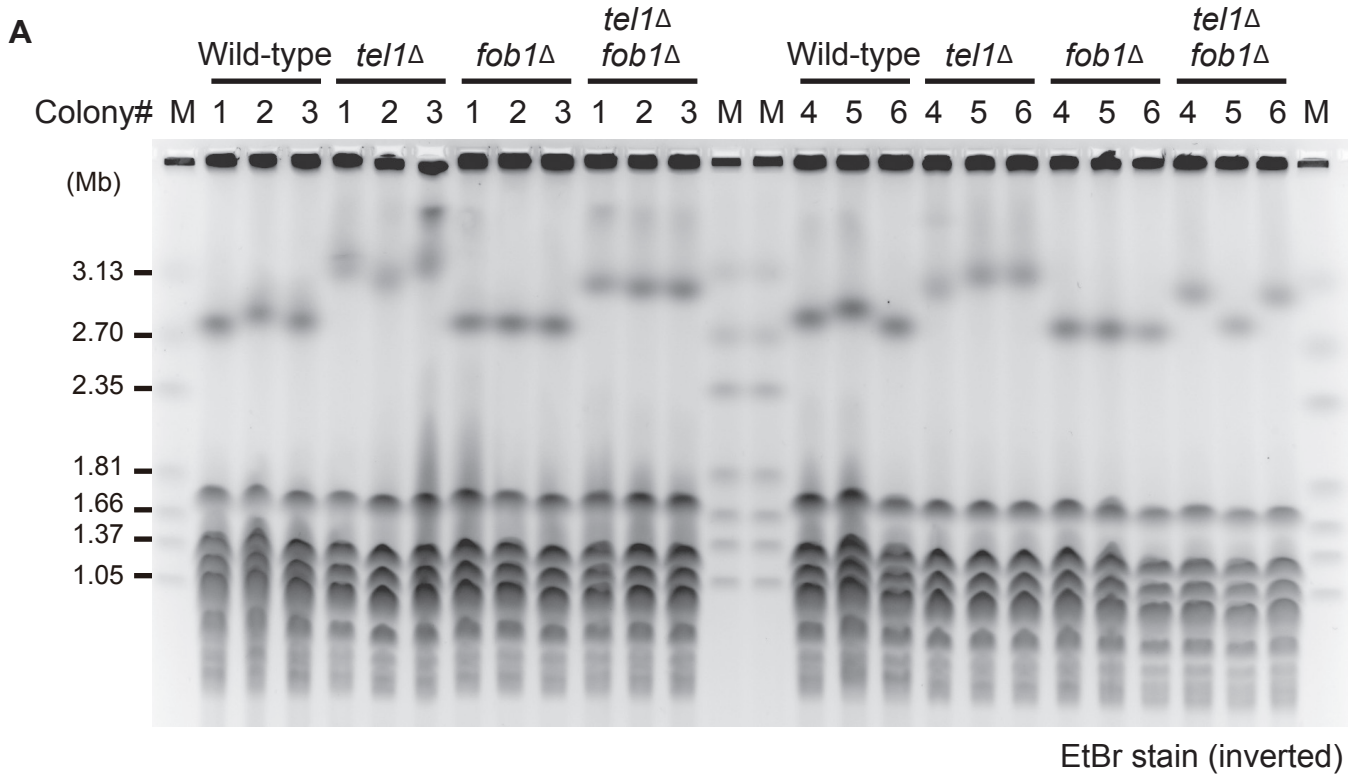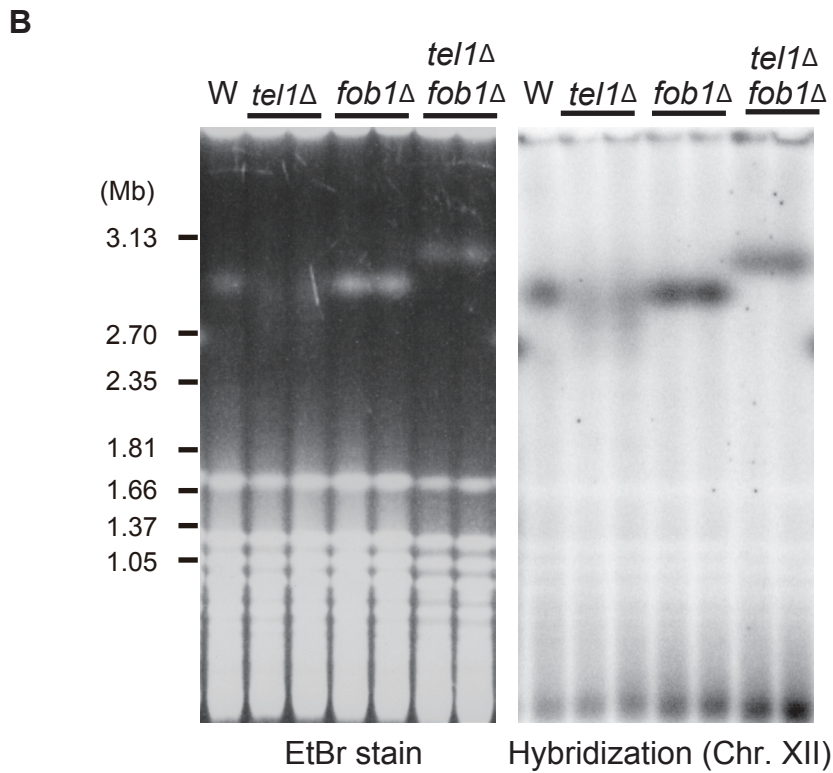

Supplement: pgen.1008103.s002.pdf [file pgen.1008103.s002.pdf]
