# Supplementary material for: Ribosomal RNA gene repeats associate with the nuclear pore complex for maintenance after DNA damage
Source: PubMed Central journal article supplement (PMC6490929; doi:10.1371/journal.pgen.1008103), 2019-04-18
Supplement: pgen.1008103.s004.pdf [file pgen.1008103.s004.pdf]

Fig.S4 Horigome and Unozawa et al, 2019

**A**

rDNA-lacO/ lacI-GFP  
Nup49-mRFP Rad52-CFP

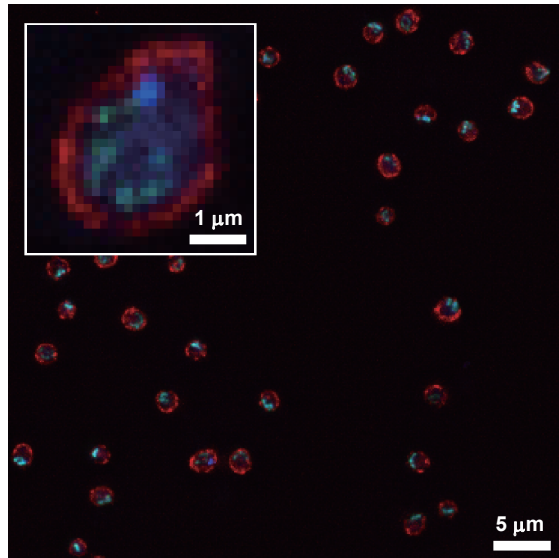

**B**

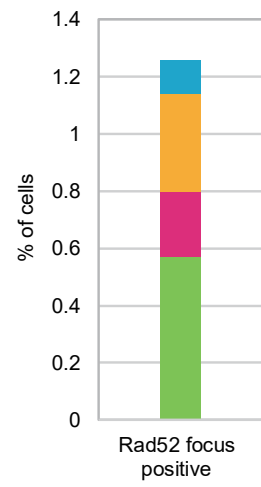

- coloc with rDNA and Nup49
- coloc with rDNA
- coloc with Nup49
- No contact with either rDNA or Nup49
